# Supplementary material for: Structurally coloured contact lens sensor for point-of-care ophthalmic health monitoring
Source: Royal Society of Chemistry journal article supplement (doi:10.1039/c9tb02389e), 2020-01-01
Supplement: c9tb02389e1.pdf [file c9tb02389e1.pdf]

## SUPPLEMENTARY INFORMATION

### Structural Colour Contact Lens Sensor for Point-of-Care Ophthalmic Health Monitoring

Yunlong Wang<sup>1,#</sup>, Qilong Zhao<sup>1,#</sup>, Xuemin Du<sup>1\*</sup>

<sup>1</sup>Institute of Biomedical & Health Engineering, Shenzhen Institutes of Advanced Technology (SIAT), Chinese Academy of Sciences (CAS), Shenzhen, 518035, China.

<sup>#</sup>These authors contributed equally to this work.

\*Corresponding author. Email: [xm.du@siat.ac.cn](mailto:xm.du@siat.ac.cn); Telephone: +86-755-86392652

#### Supplementary Table

**Table 1** Average sizes and particle distribution index (PDI) of silica colloids used for the formation of structural color contact lens sensors with different colors

|              | Colloids for preparing red sensor | Colloids for preparing green sensor | Colloids for preparing blue sensor |
|--------------|-----------------------------------|-------------------------------------|------------------------------------|
| Average size | 356±18 nm                         | 240±11 nm                           | 180±9 nm                           |
| PDI          | 0.050                             | 0.046                               | 0.050                              |

## Supplementary Figures

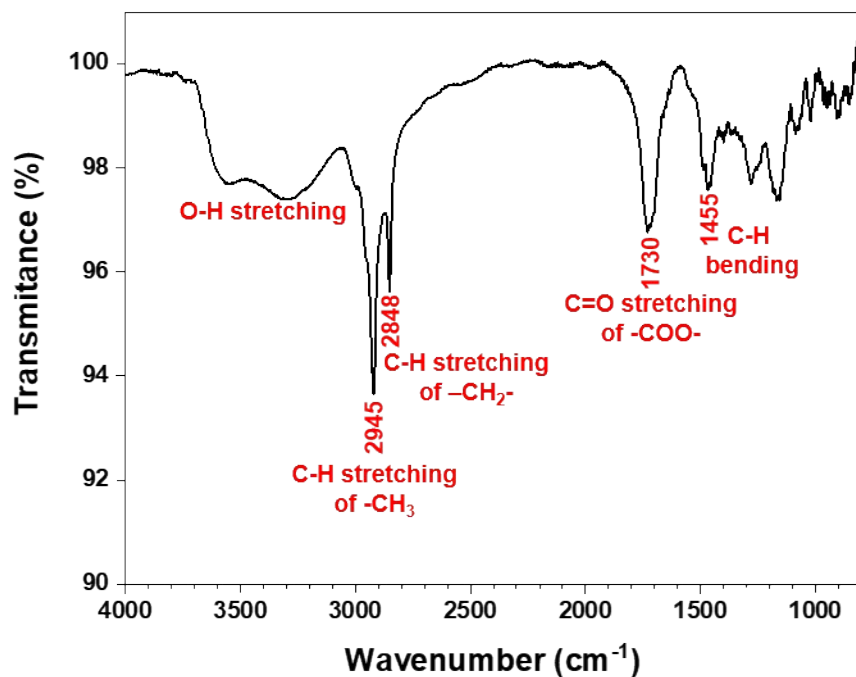

**Figure S1** FTIR spectrum of the hydrogel contact lens sensor, demonstrating its pure composition of PHEMA only.

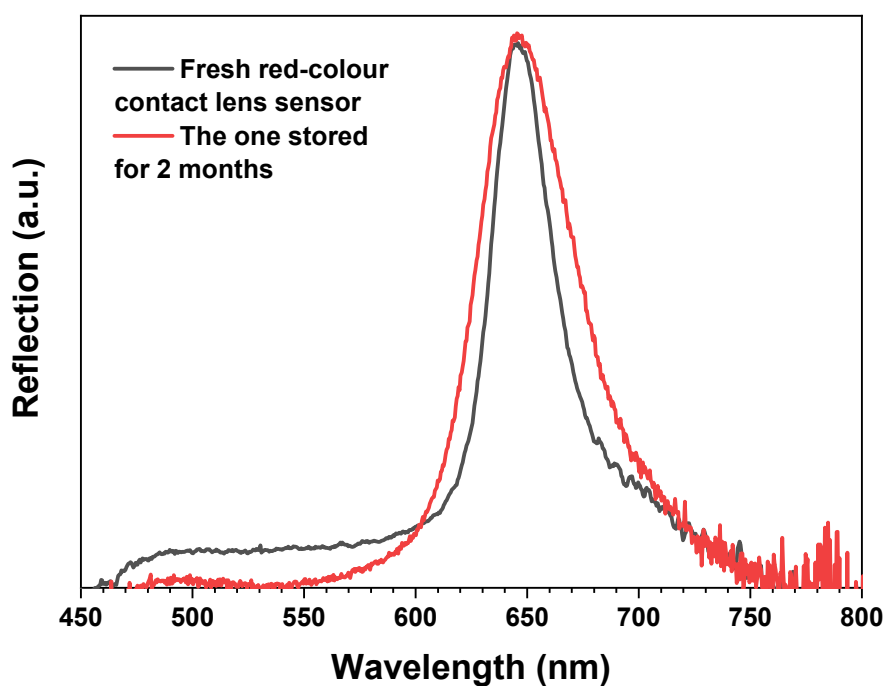

**Figure S2** The reflection spectra of the fresh red-colour contact lens sensor and the one stored in water for 2 months, demonstrating that there is no significant difference in optical properties between them.

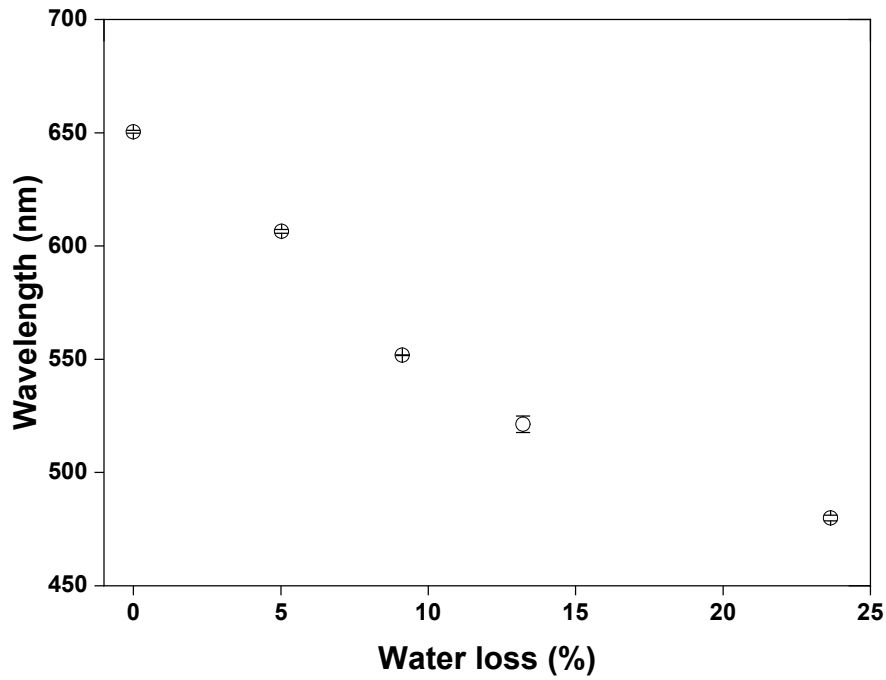

**Figure S3** The plot demonstrating the change of the wavelength of reflectance peak with respect to the water loss percentage.

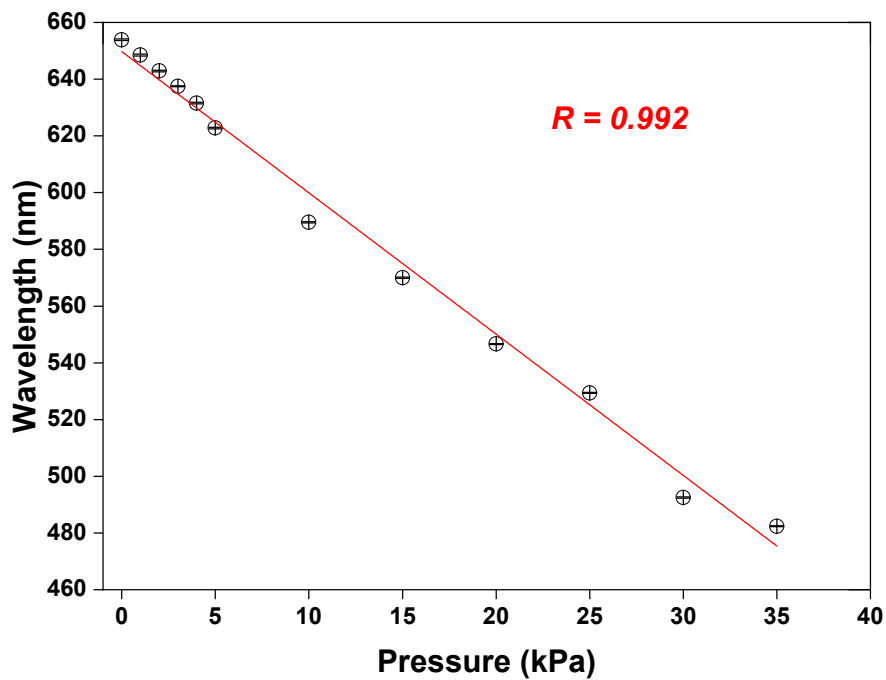

**Figure S4** The plot demonstrating the change of the wavelength of reflectance peak with respect to the pressure within the range of 0-40 kPa.
